# Supplementary material
Source: Springer Nature journal article supplement (https://www.springermedizin.de/resource/supplementary/12916_2006_96_MOESM7_ESM.pdf/9599160)

# Control graph

Illustration E: Estimated resident population by age, sex and Health Service District, 1999 and difference in age structure between Health Service District population and Queensland population

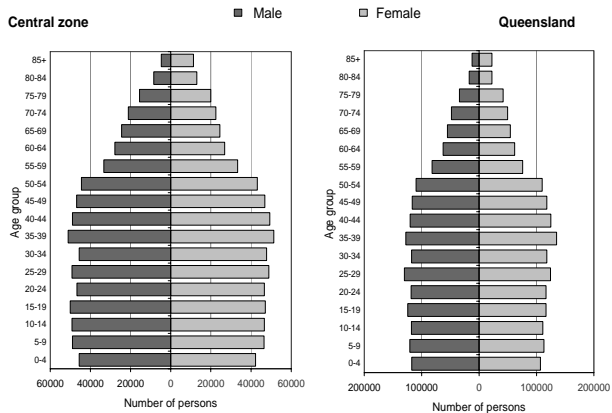

# Intervention graph

Illustration E: Estimated resident population by age, sex and Health Service District, 1999 and difference in age structure between Health Service District population and Queensland population

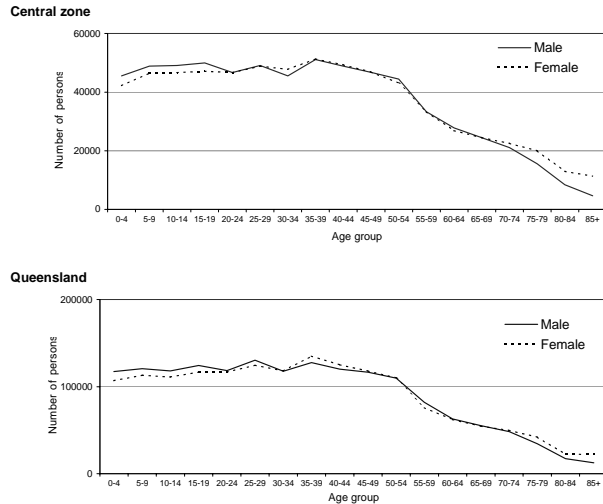

Supplement: MOESM7 [file 9599160]
